# Supplementary material
Source: Springer Nature journal article supplement (https://www.springermedizin.de/resource/supplementary/12888_2012_1373_MOESM2_ESM.pdf/9480048)
Supplement: MOESM2 [file 9480048]

.....先生/小姐您好：

## 【危機因應卡】

.....  
謝謝您願意在電話中與我分享自己的人生故事，並與我一起討論如何幫忙自己的方法。現在，我將我們一起討論的內容整理如下寄給您，希望當您遇到危機處境時，可以使用這張小卡，幫忙自己渡過難關。

..... 敬祝

..... 平安.. 快樂

高雄市衛生局關懷小組敬上

1.當我察覺到自己處於下列危險情境時：

- (1)一個人情緒低落、無人陪伴時
- (2)晚上失眠，一個人獨處時
- (3)出現聲音命令我傷害自己時

2.我會去做以下這些事，幫助我自己脫離危險情境：

- .. (1)打安心專線跟人談一談
- .. (2)找家人陪伴
- .. (3)馬上詢問家人是否有聽到聲音，尋求陪伴支持

## 【心理諮詢熱線】

安心專線 0800-788-995 (24 小時免付費)

生命線 1995

張老師 1980

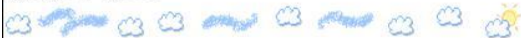

關懷訪視員林小姐.. 電話：7279547

(週一~週五，8：00~12：00、13：30~17：30)

## 【當我想要傷害自己時，我會採取下列步驟】

1.我會放下任何危險物品，以確保自己的人身安全。  
2.如果想不開的念頭一直持續並逐漸具體化，或者我發現自己準備要採取傷害自己的行動時，

- (1)我會打緊急電話給王○○，電話是 0900123456。
- .. (2)我會打緊急電話給林○○，電話是 0900123456。

3.如果我感到無法控制自己的行為時，我就到急診室或打電話給 119 求救。

\*就近醫院急診：高雄榮民總醫院

左營總醫院
